# Supplementary material for: Reproductive Mode and the Evolution of Genome Size and Structure in Caenorhabditis Nematodes
Source: PubMed Central journal article supplement (PMC4482642; doi:10.1371/journal.pgen.1005323), 2015-06-26
Supplement: pgen.1005323.s002.pdf [file pgen.1005323.s002.pdf]

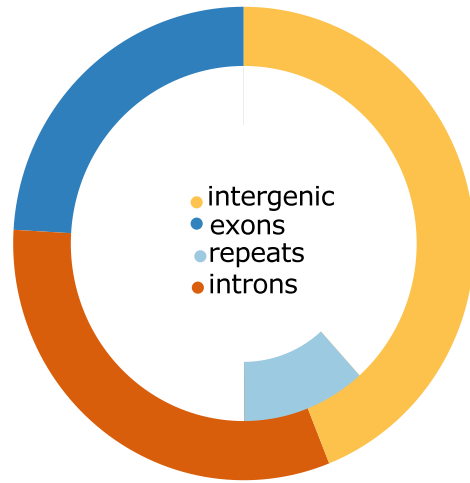

**S1 Figure.** Analysis of the Wormbase *C. remanei* genome sequence.
