# Supplementary material for: Reproductive Mode and the Evolution of Genome Size and Structure in Caenorhabditis Nematodes
Source: PubMed Central journal article supplement (PMC4482642; doi:10.1371/journal.pgen.1005323), 2015-06-26
Supplement: pgen.1005323.s007.pdf [file pgen.1005323.s007.pdf]

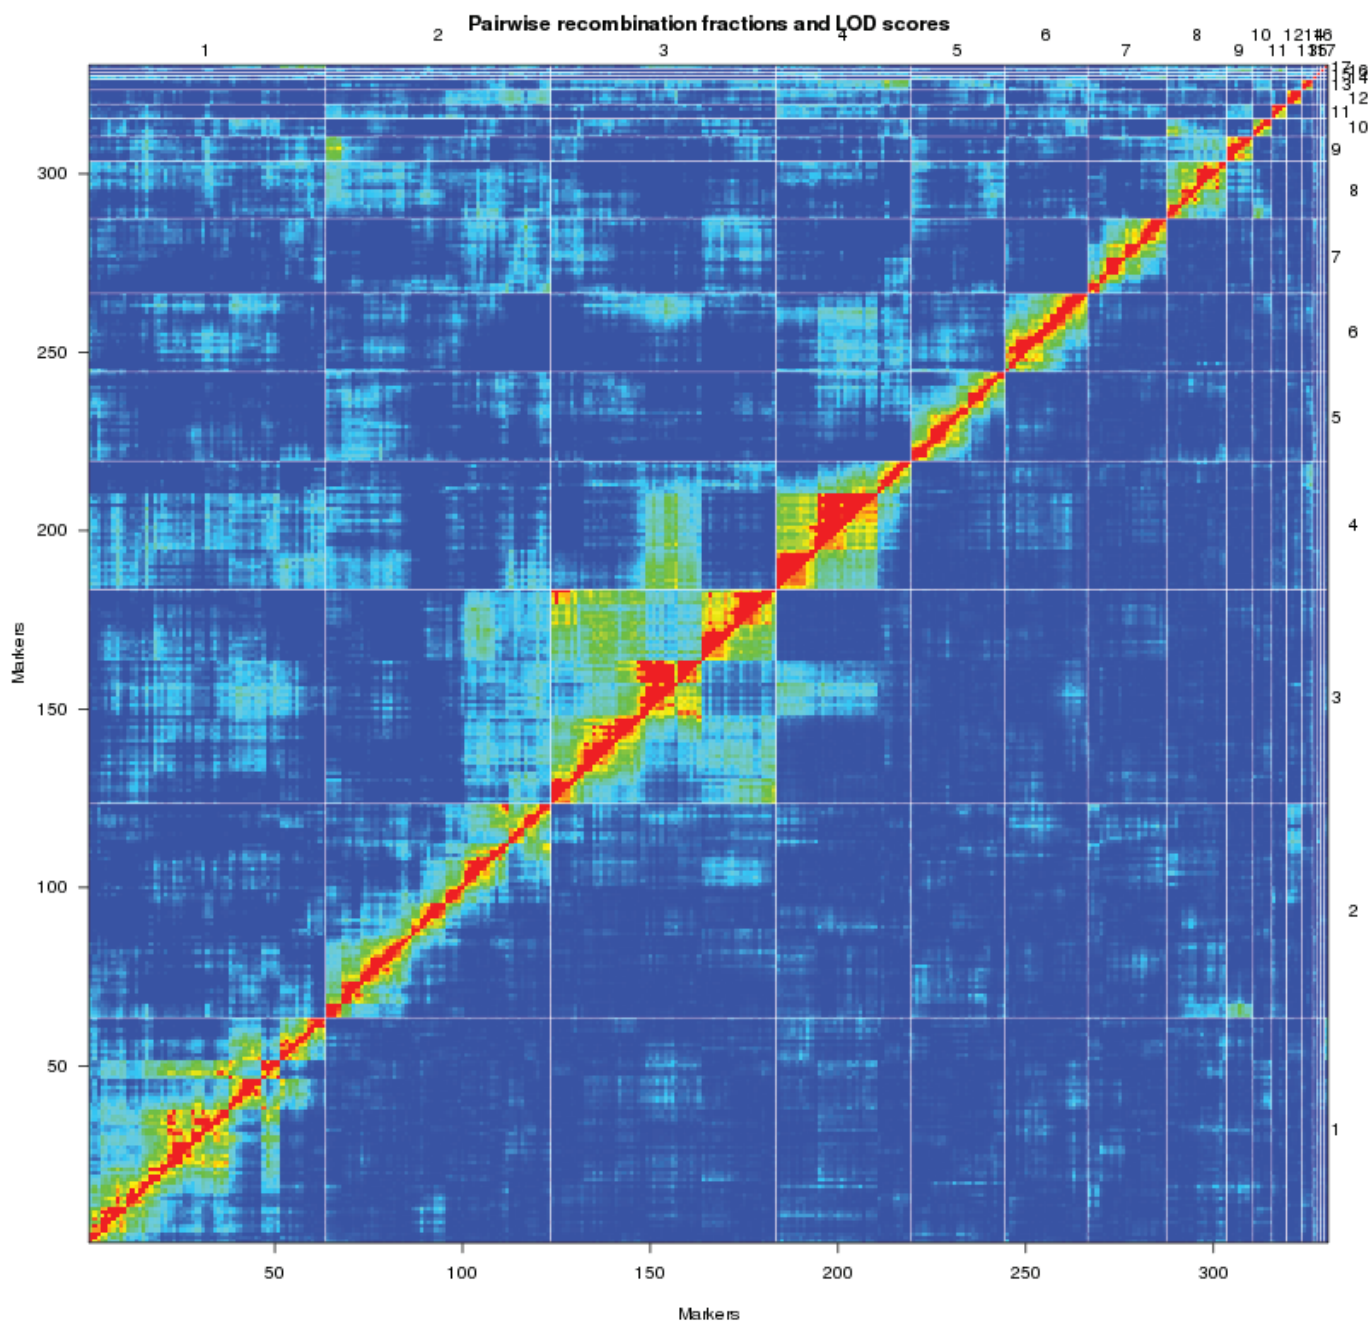

**S6 Figure.** Pairwise recombination fractions and LOD scores for the final genetic map. Areas of low recombination are shown in red and areas of high recombination are shown in blue.
