# Supplementary material for: Reproductive Mode and the Evolution of Genome Size and Structure in Caenorhabditis Nematodes
Source: PubMed Central journal article supplement (PMC4482642; doi:10.1371/journal.pgen.1005323), 2015-06-26
Supplement: pgen.1005323.s011.pdf [file pgen.1005323.s011.pdf]

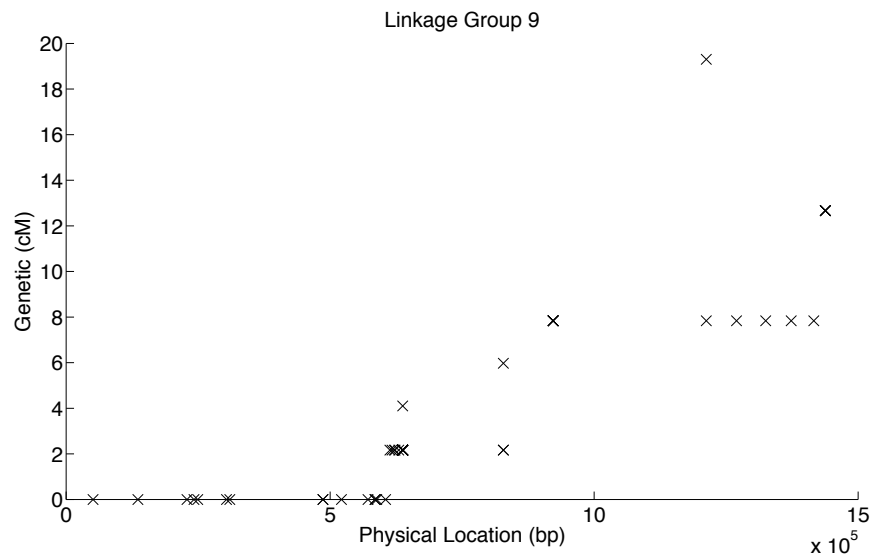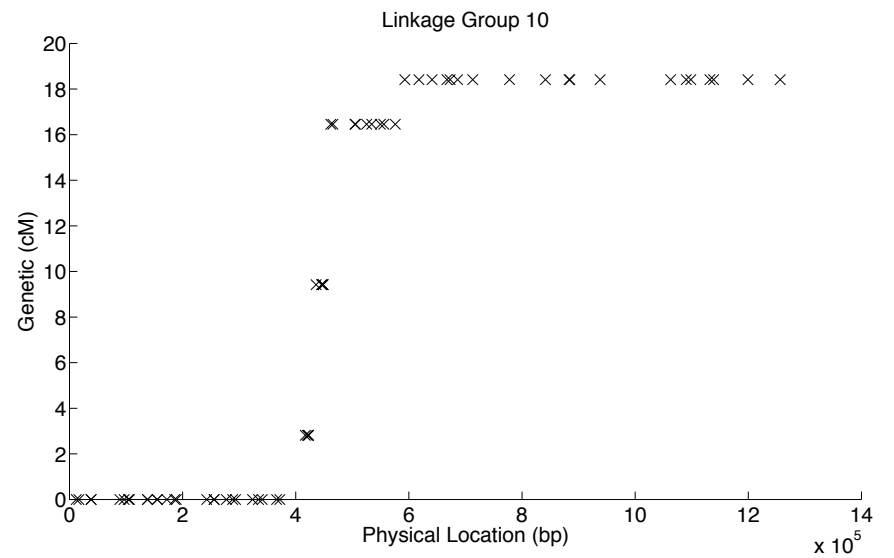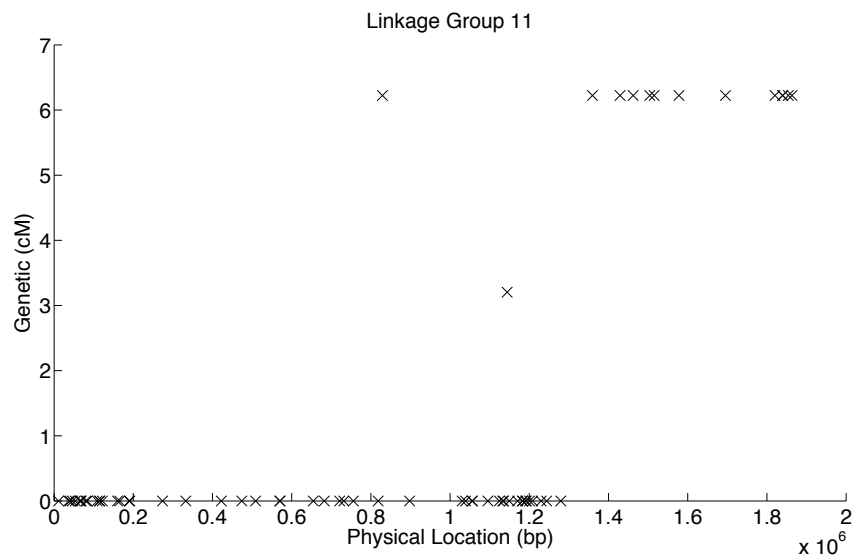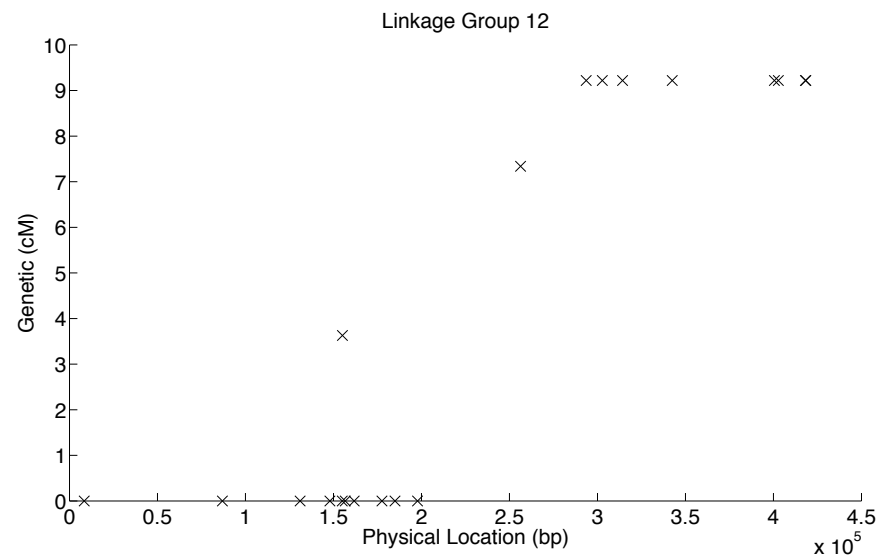

**S10 Figure.** Relationship between physical and genetic maps for linkage groups 9-12.
