# Supplementary material for: Reproductive Mode and the Evolution of Genome Size and Structure in Caenorhabditis Nematodes
Source: PubMed Central journal article supplement (PMC4482642; doi:10.1371/journal.pgen.1005323), 2015-06-26
Supplement: pgen.1005323.s014.pdf [file pgen.1005323.s014.pdf]

**S1 Table.** Repetitive content and length aligned to the existing Wormbase *C. remanei* genome

| Assembly                                   | % Genome estimated repetitive | Length aligned |
|--------------------------------------------|-------------------------------|----------------|
| PX356 (1/2 data)                           | 20                            | 108.62         |
| PX356 (full dataset)                       | 22                            | 106.64         |
| 1/2 data, haploidify                       | 22                            | 109.41         |
| full data, haploidify option               | 20                            | 104.69         |
| full data, k-mer filtered (k=15)           | 16                            | 110.01         |
| full data, haploidify, k=11                | 10                            | 89.63          |
| full data, haploidify, k=13                | 12                            | 96.35          |
| <b>full data, haploidify, k=15</b>         | <b>15</b>                     | <b>119.72</b>  |
| full data, haploidify, k=17                | 15                            | 114            |
| full data, haploidify, filtered mate pairs | 15                            | 98.66          |
