# Supplementary material for: Reproductive Mode and the Evolution of Genome Size and Structure in Caenorhabditis Nematodes
Source: PubMed Central journal article supplement (PMC4482642; doi:10.1371/journal.pgen.1005323), 2015-06-26
Supplement: pgen.1005323.s015.pdf [file pgen.1005323.s015.pdf]

**S2 Table.** Summary of genome statistics for each species as analyzed using our uniform pipeline.

|                                                  | Self-reproducing (androdioecious) |                    |                      | Outcrossing (gonochoristic/dioecious) |                    |                    |                   |
|--------------------------------------------------|-----------------------------------|--------------------|----------------------|---------------------------------------|--------------------|--------------------|-------------------|
|                                                  | <i>C. elegans</i>                 | <i>C. briggsae</i> | <i>C. tropicalis</i> | <i>C. sinica</i>                      | <i>C. brenneri</i> | <i>C. japonica</i> | <i>C. angaria</i> |
| <b>Size of assembled genome (Mb)<sup>1</sup></b> |                                   |                    |                      |                                       |                    |                    |                   |
| Exons <sup>2</sup>                               | 29                                | 25                 | 25                   | 39                                    | 43                 | 24                 | 22                |
| Introns <sup>2</sup>                             | 35                                | 33                 | 16                   | 29                                    | 45                 | 41                 | 25                |
| Intergenic                                       | 37                                | 50                 | 38                   | 63                                    | 103 <sup>3</sup>   | 101                | 59                |
| Total                                            | 100                               | 108                | 79                   | 131                                   | 190                | 166                | 105               |
| <b>Repetitive content</b>                        |                                   |                    |                      |                                       |                    |                    |                   |
| Size (Mb)                                        | 13                                | 24                 | 6                    | 18                                    | 29                 | 70 <sup>4</sup>    | 11                |
| Proportion of the assembled genome               | 13%                               | 22%                | 8%                   | 14%                                   | 15%                | 42%                | 11%               |

<sup>1</sup>Reported values are for our re-annotation of these genomes using a uniform pipeline.

<sup>2</sup>Exonic, intronic, and intergenic portions can sum to greater than the total genome size because of alternative splicing. The exonic portion is underestimated by our computational pipeline because we are predicting fewer alternative mRNA models than have been experimentally validated.

<sup>3</sup>Our re-annotation predicted a much larger genic footprint for *C. brenneri* and a much larger repeat content for *C. japonica*, consistent with previous findings on allelism in both assemblies [19].
