# Supplementary material for: Reproductive Mode and the Evolution of Genome Size and Structure in Caenorhabditis Nematodes
Source: PubMed Central journal article supplement (PMC4482642; doi:10.1371/journal.pgen.1005323), 2015-06-26
Supplement: pgen.1005323.s016.pdf [file pgen.1005323.s016.pdf]

**S3 Table.** Assembly size, contig length, scaffold length, N50 for contigs and N50 for scaffolds. All lengths are given in Mb. The final parameter choices are shown in bold in the table.

| Assembly                                   | Contig Length | Scaffold Length | N50 Contig  | N50 Scaffold |
|--------------------------------------------|---------------|-----------------|-------------|--------------|
| PX356 (1/2 data)                           | 125.82        | 131.06          | 41.5        | 305          |
| PX356 (full dataset)                       | 133.05        | 139.06          | 23.4        | 74           |
| 1/2 data, haploidify                       | 125.75        | 130.7           | 42.4        | 313          |
| full data, haploidify option               | 131.49        | 138.3           | 25.9        | 112          |
| full data, k-mer filtered (k=15)           | 134.69        | 139.58          | 24.5        | 59           |
| full data, haploidify, k=11                | 111.66        | 113.7           | 5.4         | 6            |
| full data, haploidify, k=13                | 122.4         | 132.8           | 17.1        | 142          |
| <b>full data, haploidify, k=15</b>         | <b>130.52</b> | <b>136.79</b>   | <b>34.9</b> | <b>311</b>   |
| full data, haploidify, k=17                | 113.6         | 114             | 8           | 12           |
| full data, haploidify, filtered mate pairs | 126.4         | 132.52          | 25.5        | 252          |
