# Supplementary material for: Reproductive Mode and the Evolution of Genome Size and Structure in Caenorhabditis Nematodes
Source: PLOS journal article supplement (doi:10.1371/journal.pgen.1005323), 2015-06-26
Supplement: S13 (10.1371/journal.pgen.1005323.s013) [file journal.pgen.1005323.s013]

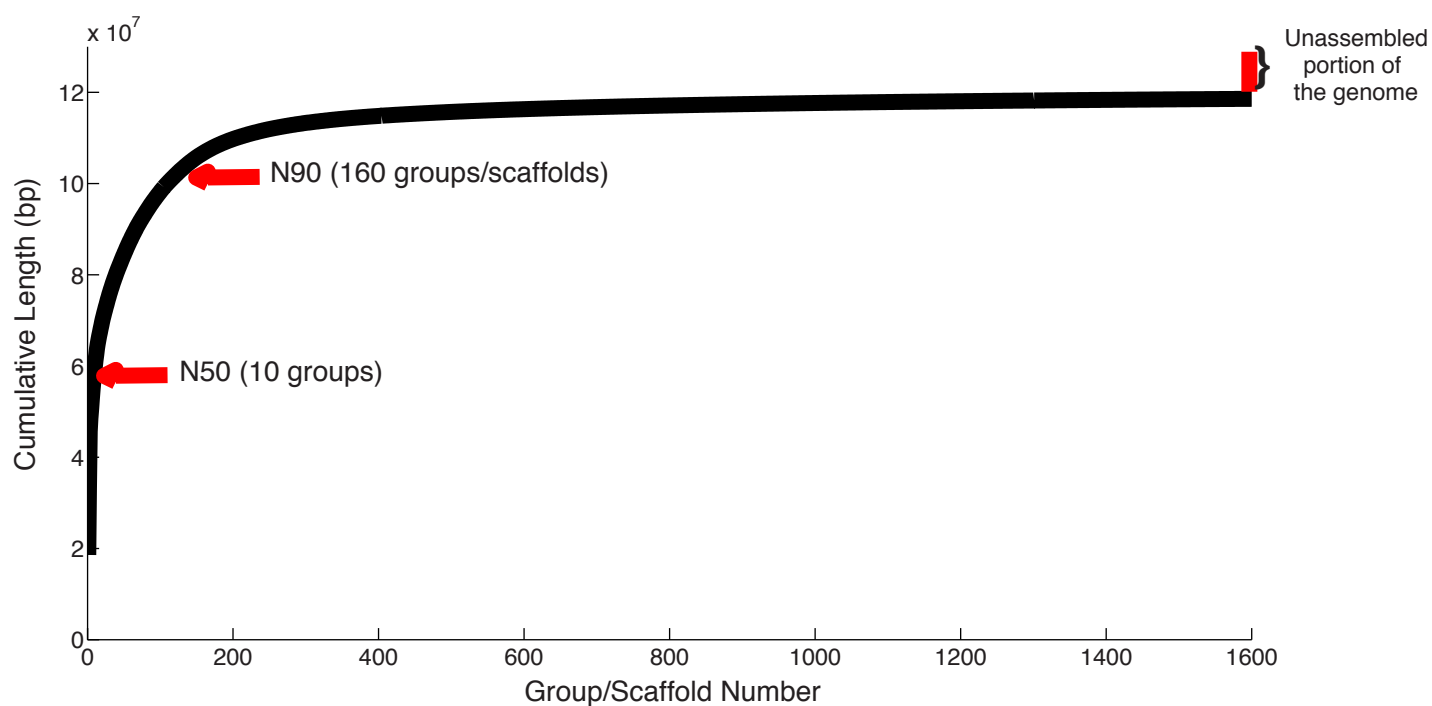

**S12 Figure.** The cumulative length distribution of the linkage groups and scaffolds. Roughly 50% of the 118.5Mb assembly is contained in 10 large linkage groups and scaffolds, and 90% of the length is contained in 160 linkage groups and scaffolds.
